# Supplementary material for: The spin state of a charged non-IPR fullerene: the stable radical cation of Sc3N@C68
Source: Royal Society of Chemistry journal article supplement (doi:10.1039/b610550e), 2006-10-24
Supplement: b610550e.pdf [file b610550e.pdf]

## The spin state of a charged non-IPR Fullerene: The stable radical cation of

### Sc<sub>3</sub>N@C<sub>68</sub>

Shangfeng Yang,\*<sup>a</sup> Peter Rapta<sup>a,b</sup> and Lothar Dunsch\*<sup>a</sup>

<sup>a</sup> Group of Electrochemistry and Conducting Polymers, Leibniz-Institute for Solid State and Materials Research (IFW) Dresden, D-01171 Dresden, Germany

<sup>b</sup> Department of Physical Chemistry, Faculty of Chemical and Food Technology, Slovak University of Technology, Radlinskeho 9, SK-81237 Bratislava, Slovak Republic

**Table S1.** Redox potentials and electrochemical energy gap  $\Delta E_{\text{gap,ec}}$  (V) of Sc<sub>3</sub>N@C<sub>68</sub> in comparison with the data of Sc<sub>3</sub>N@C<sub>80</sub> (*I<sub>h</sub>*)

| sample                                                     | Redox potential (V vs Fc/Fc <sup>+</sup> ) |                                    |                      |                      | Energy gap<br>$\Delta E_{\text{gap,ec}}$<br>(V) <sup>b</sup> | Reference |
|------------------------------------------------------------|--------------------------------------------|------------------------------------|----------------------|----------------------|--------------------------------------------------------------|-----------|
|                                                            | $E_{1/2}$ ,<br>red(1) <sup>a</sup>         | $E_{1/2}$ ,<br>red(2) <sup>a</sup> | $E_{1/2}$ ,<br>ox(1) | $E_{1/2}$ ,<br>ox(2) |                                                              |           |
| Sc <sub>3</sub> N@C <sub>68</sub>                          | -1.38 <sup>a</sup>                         | -1.98                              | 0.33                 | 0.85                 | 1.71                                                         | this work |
|                                                            | -1.24                                      | -1.62                              | 0.62                 | -                    | 1.86                                                         | 17        |
| Sc <sub>3</sub> N@C <sub>80</sub> ( <i>I<sub>h</sub></i> ) | -1.26                                      | -1.62                              | 0.59                 | -                    | 1.85                                                         | 21        |
|                                                            | -1.22                                      | -1.59                              | 0.62                 | -                    | 1.84                                                         | 22        |

<sup>a</sup> Because of the obvious irreversibility of the two reduction steps, the formal potential of the reduction of Sc<sub>3</sub>N@C<sub>68</sub> is taken by the half-peak potential.

<sup>b</sup> Electrochemical gap is calculated as  $E_{1/2, \text{ox}(1)} - E_{1/2, \text{red}(1)}$ .

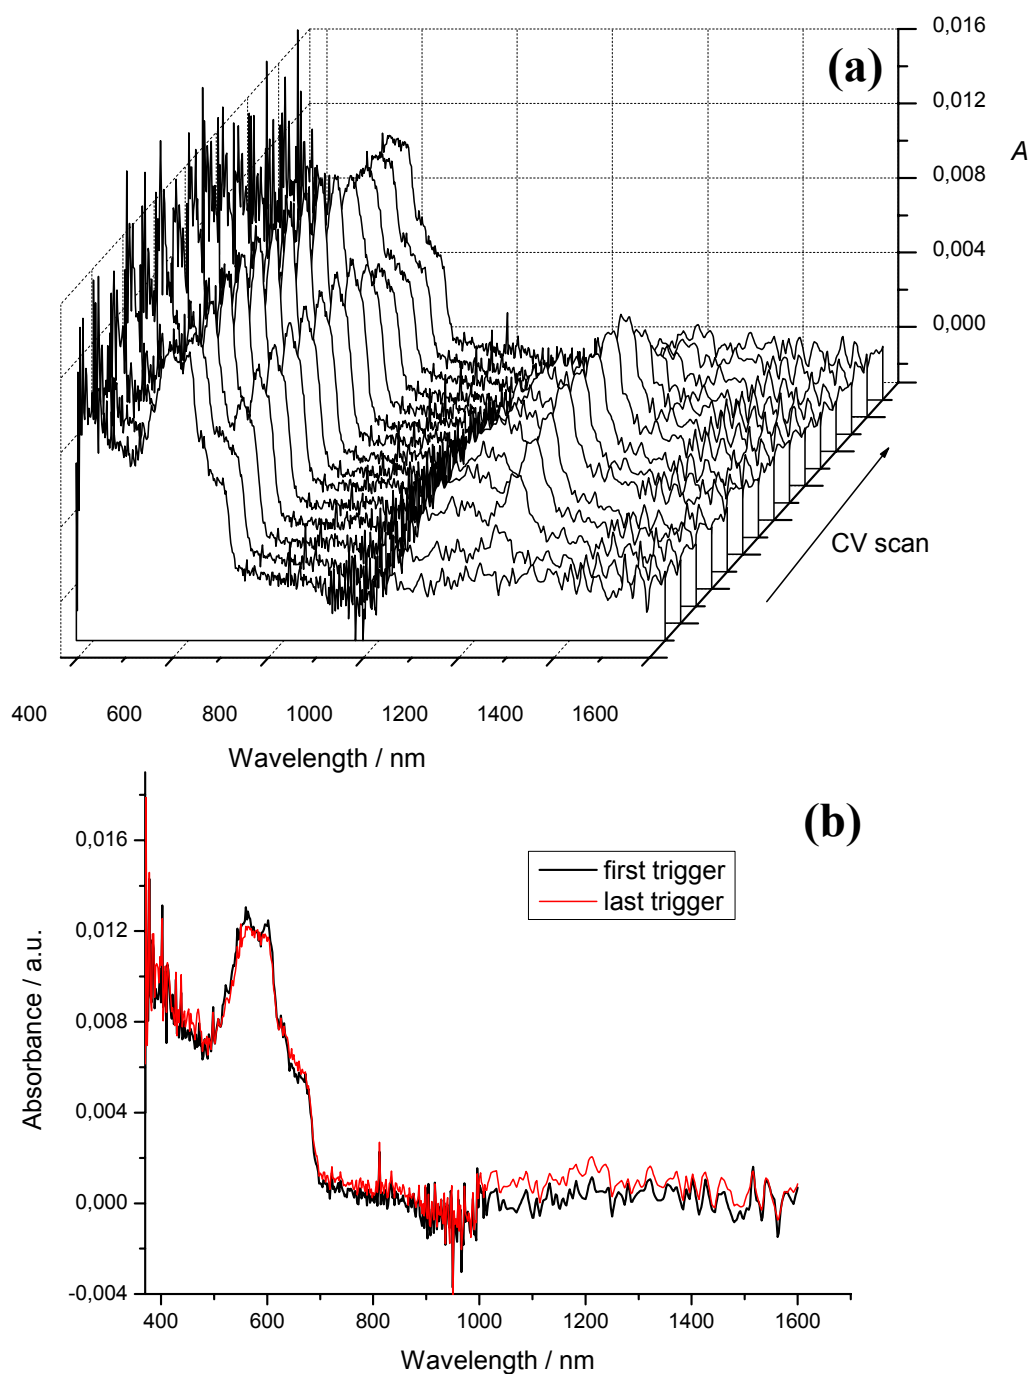

**Figure S1.** *In situ* spectroelectrochemistry of Sc<sub>3</sub>N@C<sub>68</sub> oxidation in 0.2 M TBAPF<sub>6</sub>/o-DCB: a) UV-Vis-NIR spectra (in a 3D plot) recorded during the cyclic voltammetric scan in the potential range from -0.2 to 0.8 V vs. Fc/Fc<sup>+</sup> (scan rate: 3 mV s<sup>-1</sup>). b) The spectra of Sc<sub>3</sub>N@C<sub>68</sub> recorded before (black line) and after (red line) CV scan.
